# Supplementary material
Source: Springer Nature journal article supplement (https://www.springermedizin.de/resource/supplementary/12958_2006_335_MOESM1_ESM.pdf/9567650)
Supplement: MOESM1 [file 9567650]

**Functional CL**

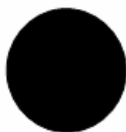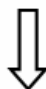

Induction of Regression  
(physiological or pathological)

**Regressing CL**

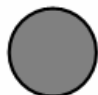

No Intervention

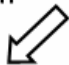

Reprogramming

(e.g. in rats, via androstenedione  
or progesterone)

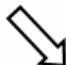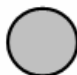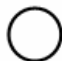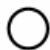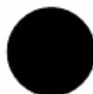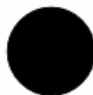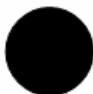

**Regressed CL**  
(non-functional)

**Reprogrammed CL**  
(functional)
